# Supplementary material
Source: Elsevier journal article supplement (https://www.sciencedirect.com/science/article/pii/S2666506920300560)
Supplement: mmc1 [file S2666506920300560:mmc1.docx]

**Entrenamiento de fuerza en relación con la prevención de lesiones en el fútbol femenino profesional y semiprofesional: Una revisión sistemática**

**RESUMEN**

El aumento de la práctica por parte del sector femenino hace que conocer las causas que pueden causar patologías en el aparto locomotor sea más importante.Diversos factores son los que pueden desencadenar en limitaciones motrices y generar patologías en el aparato locomotor.El objetivo de este estudio es establecer unas bases metodológicas con relación al tipo de trabajo y los parámetros que componen el entrenamiento de fuerza hacia la prevención de lesiones en el fútbol femenino profesional y semiprofesional.Para ello, se ha realizado una búsqueda mediante las plataformas *Google Scholar* y *Pubmed,* incluyendo una franja temporal des del 2000 hasta diciembre de 2019. Se ha realizado un análisis de 8 estudios, en los que se observan relaciones positivas en la reducción de lesiones en diferentes tipos de entrenamiento, proponiendo así que el entrenamiento de fuerza muestra efectos beneficios respecto a la prevención de lesiones de diferente naturaleza.

Palabras clave: revisión sistemática, entrenamiento de fuerza, fútbol femenino, prevención de lesiones

***ABSTRACT***

*The increased practice by the female sector makes knowing the causes that can cause pathologies in the musculoskeletal system more important. Various factors are what can trigger motor limitations and generate pathologies in the musculoskeletal system. The objective of this study is to establish methodological bases in relation to the type of work and the parameters that make up strength training towards injury prevention in professional and semi-professional women's football. To do this, a search was carried out using the Google Scholar and Pubmed platforms, including a time frame from 2000 to December 2019. An analysis of 8 studies was carried out, in which positive relationships were observed in the reduction of injuries in different types of training, thus proposing that strength training shows beneficial effects regarding the prevention of injuries of a different nature.*

*Keywords: systematic review, strength training, female soccer, injury prevention*

**INTRODUCCIÓN**

La ejecución deficiente, el sobreuso de ciertos grupos musculares y los posibles desequilibrios entre musculatura antagonista pueden desencadenar en limitaciones motrices y generar patologías en el aparato locomotor (1) aumentando el riesgo de lesión en el fútbol femenino, modalidad deportiva desarrollada a alta intensidad y con contacto (2).

En relación a la magnitud del problema, en el fútbol de alto rendimiento, se producen aproximadamente 9 lesiones por cada 1000 horas de exposición, teniendo en cuenta entrenamientos y competición (1). Específicamente, en el fútbol femenino los índices se encuentran en 12.6 a 24 cada 1000 horas de exposición en partidos y de 1.2 a 7 cada 1000 horas de exposición en entrenamientos (3) mostrando un riesgo de lesión más elevado. Los ratios presentados, engloban toda la tipología de lesiones dentro del fútbol femenino, destacando rodilla (30.4%) y tobillos (17.9%) como articulaciones más afectadas (4).

En relación con las lesiones que más afectan a este sector, parecer ser que las contusiones son las lesiones más frecuentes, seguidas de distensiones de tobillo y rotura de fibras (5). Aunque en relación a la articulación de la rodilla, el ligamento cruzado anterior (LCA) es una de las lesiones más frecuentes y severas soportadas por las futbolistas (6) dada su mayor predisposición delante de esta lesión atendiendo a la variación del tamaño y forma de la pelvis, ancho de la muesca intercondilar, el ángulo Q y la laxitud ligamentosa que puede existir del sexo femenino respecto al masculino estableciendo proporcionalmente, una diferencia de entre 2 a 8 veces mayor la incidencia de esta lesión en la modalidad femenina respecto a la masculina (7).

Para poder reducir el número de lesiones especificas en las jugadoras futbol, la bibliografía propone diferentes métodos. Algunos autores indican que en general la actividad física demostró reducir las lesiones deportivas, aunque el trabajo de fuerza y el trabajo propioceptivo fueron los tipos de entrenamiento que más mejoras demostraron (8). Por otro lado, el trabajo de flexibilidad parece no reportar mejoras en este apartado. Con relación a lesiones más específicas, parece ser que para reducir el número de lesiones de LCA en deportistas, el tipo de entrenamiento que mejores resultados reportó fue el entrenamiento neuromuscular, además de incluir aspectos como la pliometria y el entrenamiento de la zona denominada “CORE” dado que éstos podrían ser métodos efectivos en la reducción de lesiones de esta naturaleza (9). Atendiendo a las distensiones de los ligamentos del tobillo; se reporta que mediante los estímulos neuromusculares que nos aporta el entrenamiento propioceptivo se reduce su incidencia lesional (10). Por último, en relación a las roturas musculares, parece ser que multiprogramas de entrenamiento que incluyan propiocepción, trabajo funcional de fuerza y estabilidad del CORE, conocido cómo el conjunto de músculos que se incluyen en el complejo lumbo pélvico y cadera (11) pueden ayudar a su prevención (12). A su vez, se especifica que el trabajo de fuerza excéntrica podría ser el más recomendable para la prevención de lesiones musculares de la cadena posterior (13).

El objetivo de esta revisión sistemática es establecer unas bases metodológicas con relación al tipo de trabajo y los parámetros que componen el entrenamiento de fuerza que se realiza con una orientación hacia la prevención de lesiones en el fútbol femenino profesional y semiprofesional.

**MÉTODO**

- **Criterios de inclusión**

Los criterios de inclusión de la revisión han sido utilizar sólo estudios que incluyan categorías profesionales o semiprofesionales de fútbol. Los estudios utilizados han sido de los últimos diecinueve años (2000-2019), sólo incluyendo los estudios que reportaban resultados en relación con el fútbol y que mostraban un grupo control, sin incluir otras revisiones bibliográficas. Dentro de estos criterios, no se han incluido publicaciones en congresos y sólo se han utilizado estudios que han reportado resultados en relación con el sexo femenino. El lenguaje utilizado incluido en los criterios es castellano, catalán e inglés.

- **Criterios de exclusión**

En relación a los criterios de exclusión, se especifica que estudios sin contemplar grupo control o estudios englobados dentro del proceso de “return to play” (RTP) no han sido incluidos en este estudio. Además de resaltar la exclusividad de utilización de estudios, alejando la utilización de libros.

- **Fuentes de información**

Se realizó una búsqueda bibliográfica mediante ordenador en el período comprendido entre 2000-2019, que finaliza en diciembre de 2019, las bases de datos utilizadas en la revisión han sido *PubMed* y *Google Scholar*.

- **Estrategia de búsqueda**

Se buscaron campos de título, resumen y palabras clave en cada una de las bases de datos utilizadas utilizando los siguientes términos: En *Pubmed*, se utilizaron (“Strenght training” OR “Resistance training”) AND “female” AND (“soccer” OR “football”) AND “injury”; por otro lado, en *Google Scholar* se ha utilizado “Strenght training” OR “Resistance Training” AND “female soccer” OR “female football” AND “injury”, además de utilizar como palabras implícitas en el título “female injury”.

- **Proceso de extracción de datos y selección de los estudios**

Los registros se exportaron a una base de datos electrónica a un software de gestión de referencias bibliográficas (Mendeley Desktop, 1.19.4, Mendely Ltd., 2008-2019) en el cuál se eliminaron las referencias duplicadas. En la figura X se muestra el diagrama de flujos utilizado en la identificación de los estudios utilizados y los criterios de elegibilidad utilizados para esta revisión sistemática. Después de la obtención de los artículos no duplicados, se realizó una visión de títulos, resúmenes y palabras clave, en la cuál se aplicaron los criterios de exclusión y se excluyeron los estudios no relacionados con la investigación; seguidamente se realizó una revisión de los textos completos para seguidamente excluir definitivamente los estudios que no seguían los criterios de eligibilidad o no tenían relación con el objetivo del estudio. Dentro de este apartado se visualizaron las referencias utilizadas para incluir estudios no visualizados anteriormente y que fueran de suficiente interés. Cada artículo fue revisado para obtener información de (1) autorías, (2) tipo de muestra, (3) tipo de entrenamiento relacionado con la fuerza utilizado, (4) programación del entrenamiento de fuerza, (5) tipo de lesión registrada, (6) Edad de las sujetos y (7) Nivel de competición.

- **Síntesis de los resultados**

La revisión de los textos fue en busca de las siguientes variables de estudio son: Entrenamiento de fuerza, tipo de entrenamiento priorizado, días de periodización, número de lesiones y tipo de lesiones. Las medidas y parámetros derivados de las variables expuestas fueron considerados el resultado principal de éstos.

Included

Eligibility

Screening

Identification

**Total n incluidos en la revisión= 8 artículos**

Después de la observación del texto completo

**Excluidos=8**

1. **No tener un protocolo basado en el entrenamiento de la fuerza**
2. **No utilizar grupo control**
3. **No nivel profesional o semiprofesional**

**Incluidos= 2**

1. **Identificados de la lista de posibles elegidos**

Posibles elegibles= **14 resultados**

**(Inclusión basada en el resumen)**

Después de la observación de título, resumen y palabas clave

**Excluidos= 116**

1. **No estar relacionado directamente con el deporte indicado**
2. **Estudios con sexo masculino**
3. **Estudios relacionados con “return to play”**

Total estudios= **170 resultados**

**Después de eliminar los duplicados, revisiones, tesis o libros= 130 resultados**

*Figura 1. Diagrama de flujos en relación con la búsqueda.*

**“PubMed”**

77 resultados

**“Google Scholar”**

93 resultados

**RESULTADOS**

- **Selección de los estudios**

La búsqueda realizada reportó un total de 170 resultados, a partir de la eliminación de los duplicados, anteriores revisiones, tesis y libros; la búsqueda se redujo a 130 resultados. A partir de este punto, mediante la revisión del título, resumen y las palabras clave utilizadas, se eliminaron un total de 115 estudios, dejando un total de 15 resultados como “posibles elegibles”. Seguidamente mediante la observación del texto completo, hubo una exclusión final de 8 artículos y una inclusión de 2 artículos, reportando finalmente un total de 9 estudios en la selección final. (Fig. 1)

Todos los estudios elegidos están repartidos entre la franja de años planteada, de esta manera podemos ver como es un tema importante de investigación desde hace años.

- **Participantes**

En relación al tipo de muestra, más de la mitad de los estudios reportaron una muestra no randomizada de los participantes, reportando los restantes, muestras randomizadas.

- **Características de los estudios**

| **Autores** | **Muestra** | **Tipo de entrenamiento** | **Programación entrenamiento** | **Tipo de lesión** | **Edad** | **Nivel de competición** |
| --- | --- | --- | --- | --- | --- | --- |
| ***Söderman & et al (2000)*** | No randomizada | Ejercicios en Balance board | Durante 30 días cada día + el resto de la temporada 3 días (10-15 min) | LCA | 20.4 +/- 4.6 | 2ª y 3ª división sueca |
| ***Greska, Cortes, Van Lunnen & Oñate (2012)*** | No randomizada | P: Levantamientos olímpicos  FV: Pliometria + habilidades específicas | 10 semanas  P: 6 sem x 2 días (60 min)  FV: 4 sem x 2 días (60 min) + 6 sem x 2 días (30 min) | LCA | 19.2+/- 0.8 | 1 división NCAA |
| ***Steffen, Myklebust, Olsen, Holme & Bahr (2008)*** | Randomizada | Pliometria + Trabajo Excéntrico + Entrenamiento de la estabilidad | 15 min x 8 meses | General | 13-17 | Semiprofesional |
| ***Gilchrist & et al (2008)*** | Randomizada | Ejercicios con orientación neuromuscular | 3 veces a la semana durante 1 temporada | LCA | 14-18 | 1 división NCAA |
| ***Maldembaum, Silvers & Watanabe (2005)*** | No randomizada | Orientación neuromuscular + Trabajo Excéntrico + Entrenamiento de la estabilidad + Pliometria | Durante 2 años | LCA | 14-18 | Semiprofesional |
| ***Steffen, Bakka, Myklesbust & Bahr (2008)*** | No randomizada | Pliometria + Trabajo Excéntrico + Entrenamiento de la estabilidad | 15 min x 10 semanas | General | 16-18 | Prefisional |
| ***Emery & Meeuwise (2010)*** | Randomizada | Entrenamiento neuromuscular + trabajo excéntrico | 15 min calentamiento + 5 ejercicios de fuerza + en casa 15 minutos de fuerza (cada día) durante 20 semanas | General | U13-U18 | Semiprofesional |
| ***Eisen, Danoff, Leone & Miller (2010)*** | Randomizada | Ejercicios en plataforma inestable | 12 sesiones | Lesiones ligamentosas | 18-22 | Semiprofesional |

Tabla 1. Variables analizadas en los estudios seleccionados.

- **Resultados reportados**

En los diferentes estudios encontrados, muchos de ellos la lesión investigada era la del LCA (6, 14, (15), (7), en los restantes, no había especificación de ninguna lesión en concreto; por otro lado, los métodos utilizados han sido prioritariamente ejercicios con orientación a aspectos neuromusculares en relación con el entrenamiento de fuerza, aunque muchos de ellos, también han presentado trabajos excéntricos, entrenamiento pliométrico y por último, tres de los estudios revisados, en su propuesta presentaron ejercicios con utilización de elementos perturbadores del movimiento. (Tabla 1)

En relación con los resultados reportados, los estudios nos indican que combinar programas de prevención de lesiones que incluyan acciones de control motor son efectivos en relación a las lesiones de LCA (7,14,15); e incluso en la prevención de todas las lesiones (16). Por otro lado, otros estudios nos reportan la no utilidad del programa “11+” en la prevención de lesiones y en la mejora de variables relacionadas con el condicionamiento físico en el fútbol femenino (3,17). Por ultimo, un estudio reporta resultados a favor respecto a la utilidad de programas en la mejora de la estabilidad (17). (Tabla 2)

| **Autores** | **Aplicaciones prácticas** | **Variables estadísticas** |
| --- | --- | --- |
| ***Söderman & et al (2000)*** | Una sesión de ejercicios en inestabilidad no es suficiente para prevenir las lesiones por contacto en las extremidades inferiores. El mismo entrenamiento no es efectivo en relación con la prevención de lesiones de LCA. | Lesiones menores (CI=0.49-2.17)  Lesiones moderadas (CI=0.33-1.86)  Lesiones severas (CI=2.10-57.3) |
| ***Greska, Cortes, Van Lunnen & Oñate (2012)*** | Combinar programas de prevención de lesiones para alterar la dinámica de movimiento en cadera y rodilla, combinado con programas de fuerza, reducen el riesgo de lesión en LCA. | Mejoras en la fuerza isométrica en cadera Izq (p<.00.1) y en cadera Dr (p .028), en la fuerza de adductores (p .036), mejoras en tareas de recepción de saltos y mejoras en la rotación de cadera (p .002) y por último mejoras en el momento d flexión de rodilla (p .051) |
| ***Steffen, Myklebust, Olsen, Holme & Bahr (2008)*** | No hay efectos de los programas preventivos “11+” respecto al rango de lesiones. | Respecto a todas las lesiones la relación del grupo control respecto al grupo de intervención (CI 0.8-1.2, p:0.94) |
| ***Gilchrist & et al (2008*** | El entrenamiento neuromuscular y propioceptivo puede ayudar en la prevención de lesiones de LCA en situaciones de no contacto. | Lesiones para ACL en segunda para de la temporada (z=-2.24; p.025); Lesiones para jugadores con ACL en el pasado (z=-2.00; p.046) |
| ***Maldembaum, Silvers & Watanabe (2005)*** | El entrenamiento neuromuscular puede ayudar en la prevención de lesiones de LCA. | Ratio por equipos (0.191; p<0.001)  Ratio por exposición (0.181; p<0.001) |
| ***Steffen, Bakka, Myklesbust & Bahr (2008)*** | No hay efectos relevantes de un programa de prevención “11+” respecto a variables de rendimiento. | Mejoras en Q iso 90º (p<.001); sin diferencias en los ratios Q:H; No diferencias en salto; No diferencias en habilidades específicas. |
| ***Emery & Meeuwise (2010)*** | El entrenamiento neuromuscular nos puede ayudar en la prevención de todas las lesiones, sobretodo en la etapa de adolescencia. | Grupo control (CI=2.65-4.17)  Grupo intervención (CI=1.54-2.74)  Pvalue=0.045 |
| ***Eisen, Danoff, Leone & Miller (2010)*** | Relación entre la capacidad de equilibrio y el riesgo de lesión ligamentosa. | Grupo rocker board (0.046+/- 0.076)  Grupo Dynadisc (0.031+/- 0.08)  Control (0.021+/- 0.059) |

Tabla 2. Resultados de los estudios seleccionados.

**DISCUSIÓN**

*Aplicación del trabajo de fuerza en la reducción de la lesionabilidad*

En relación a los resultados reportados, la mayoría de estudios nos reportan resultados positivos en la utilización del entrenamiento de fuerza en la reducción de lesiones relacionadas con LCA y otras lesiones ligamentosas, aunque no se encuentran los mismos resultados favorables respecto a lesiones producidas por mecanismos de contacto (6, 15). Estos resultados podrían indicar su eficiencia en la reducción de lesiones ligamentosas en la articulación de la rodilla (19, 20). La orientación de la mayoría de estudios van enfocados a las lesiones especificadas anteriormente, concretamente en LCA, esto puede ser explicado a causa de que la rodilla es la articulación más afectada en el sexo femenino en este deporte (20) y normalmente en situaciones de no contacto (4).

Por otro lado, los estudios restantes están relacionados con la reducción de la lesionabilidad en aspectos más generales (3,16,21) reportando efectos beneficiosos en la mitad de los estudios de esta orientación, respecto al índice de lesiones (16, 8), aunque contrariamente reportando efectos no beneficios mediante la utilización de protocolos estandarizados *(FIFA 11+)* (3,17).

*Orientación neuromuscular del entrenamiento de fuerza*

En relación con este tipo de orientación, en la totalidad de los estudios se ha utilizado esta vertiente para conseguir los objetivos planteados, de esta manera podemos ver que en sólo dos de los casos no se han reportado efectos positivos respecto al índice de lesionabilidad (3, 17).

La utilización de protocolos de fuerza para fomentar esta cualidad, podría estar relacionada con la influencia de cambios en la fuerza de los/as atletas y en la biomecánica de ciertos patrones de movimiento, como puede ser el aterrizaje, provocando una influencia directa sobre los parámetros indicados anteriormente que podrían influir en el mecanismo de lesiones ligamentosas. Además debemos de tener en cuenta la importancia del mecanismo perceptivo en un entorno complejo y cambiante, el cuál respecto al sexo masculino, muestra una mayor capacidad para la intuición y procesamiento analítico, aunque una menor capacitación para la percepción y acciones combinadas (22) por lo tanto la utilización de ejercicios de esta orientación que incluyan saltos, recepciones y técnicas de desaceleración (23) puede ayudar a la mejora de estos mecanismos cognitivos.

*Utilización de ejercicios pliométricos en el entrenamiento de fuerza*

El entrenamiento mediante pliometria ha sido el más utilizado en los estudios analizados, mostrando en la mayoría de ellos, resultados positivos respecto al índice de lesionabilidad, en relación a la prevención de LCA, también se muestra una gran incidencia sobre este tipo de entrenamiento respecto a la prevención de ruptura de LCA (24) , indicando que es imprescindible este tipo de ejercicios en cualquier programa de prevención en relación con la lesión especificada. Este hecho puede ser definido por la disminución de la fuerza máxima de reacción en el suelo, la disminución de la abducción y aducción de cadera durante la fase de aterrizaje, además de aumentar la potencia muscular de las extremidades inferiores (24), siempre teniendo en cuenta la utilización de ésta en múltiples planos intentando imitar la demanda competitiva y la activación muscular específica (24).

En relación a otras lesiones, la utilización del trabajo pliometria no parece ayudar en su reducción (3, 4) aunque las intervenciones han sido contextualizadas en un protocolo estandarizado *(FIFA 11+)* sin tener en cuenta en principio de individualización.

*Trabajo excéntrico en el entrenamiento de fuerza*

Diferencias han sido encontradas respecto a la prevención de lesiones en relación con el entrenamiento excéntrico, el cuál los resultados reportan mejoras en la prevención respecto a LCA (7) y respecto a una reducción general de las lesiones (16). En relación a LCA, es conocida como la musculatura del cuádriceps e isquiotibiales ayuda en la protección de la rodilla, además debemos tener en cuenta que la acción de frenada de los isquiotibiales evitan el desplazamiento anterior de la tibia, por lo tanto reportando que una asimetría entre los dos músculos nombrados podrían llevar a un aumento en el riesgo de ruptura de LCA (25), indicando que un ratio >0.6 entre cuádriceps e isquiotibiales (*Q:H ratio*) incrementa el riesgo de lesiones en las extremidades inferiores (27) .Por otro lado, en relación a otro tipo de lesiones no ligamentosas, el entrenamiento excéntrico parece ser beneficio es la reducción de lesiones musculares, relacionado con el cuádriceps y la musculatura isquiotibial, que parecen ser las más afectadas por este tipo de lesión en los/las futbolistas (26).

*Propiocepción en el entrenamiento de fuerza*

En los diversos estudios analizados se ha reportado la utilización de ejercicios con esta orientación, encontrando discrepancias en las conclusiones extraídas de éstos. Mientras que autores reportan que no hay beneficios sobre la prevención de LCA mediante mecanismos traumáticos (6), con la utilización de protocolos enfocados a este tipo de entrenamiento, además se indica que no muestra beneficios sobre el equilibrio dinámico (18). En relación a la distensión ligamentosa de la articulación del tobillo, este tipo de entrenamiento muestra una evidencia insuficiente para sujetos que no han padecido lesiones anteriores, aunque se indica su utilización en sujetos con deficiencias subyacentes, creadas a partir de lesiones previas, dado que este tipo de entrenamiento puede mantener o mejorar las vías aferentes y reflejos protectores alrededor de la articulación(10).

*Parámetros relacionados con la programación y periodización del entrenamiento*

En relación al tiempo de intervención en los estudios analizados podemos ver como mínimo los estudios que reportan beneficios se utilizan 4 semanas hasta un máximo de 2 temporadas, siendo una duración en de 6 a 8 semanas la más adecuada (18). Si tenemos en cuenta el volumen, los estudios analizados reportan una duración 10 minutos hasta 60 minutos, indicando así una variedad enorme en relación a este parámetro. La frecuencia semanal reportada por los estudios de interés muestra una frecuencia mínima de 3 días en los protocolos que reportaron influencias positivas hasta una frecuencia diaria en estudios de misma índole (19), aunque otros autores nos muestran como una frecuencia de 1 a 3 días por semana es suficiente (27), siendo el calentamiento la fase de ejecución más utilizada (19), coincidiendo con los resultados presentados; aunque se debería tener en consideración la utilización de ejercicios dentro de la sesión. Por último, indicar que los parámetros expuestos, se relacionan con parámetros generales, sin entrar a la particularidad de cada tipología de lesión.

**LIMITACIONES DEL ESTUDIO**

La limitación principal, ha sido la escasa bibliografía que, hacia referencia al problema específico planteado, por lo tanto, se requiere de más investigación hacia la problemática con el objetivo de poder ofrecer datos más relevantes respecto a la cuestión planteada. Además, la selección de dos fuentes de información posiblemente ha coartado el acceso a información relevante no identificada.

Por último, destacar la escasa evidencia científica que relaciona el trabajo de fuerza con la prevención de lesiones, atendiendo al riesgo de sesgo de los estudios analizados, lo que afectaría a la utilidad de las estrategias mostradas  (27).

**CONCLUSIONES**

Parece ser que el entrenamiento de fuerza es beneficioso en la reducción de lesiones en las futbolistas profesionales y semiprofesionales, aunque debemos de tener en cuenta que tipo de orientación utilizamos, dado que este ítem será influido por la naturaleza de éstas. Dentro de este concepto, el entrenamiento neuromuscular parece ser el que mejores beneficios reporta respecto a lesiones ligamentosas como la ruptura de LCA, indicando la utilización de ejercicios pliometricos puede ayudar en la reducción. Por otro lado, el entrenamiento propioceptivo parece no reportar los beneficios indicados para la reducción de lesiones relacionadas con la articulación del tobillo estableciendo que esta mejora en el equilibrio dinámico articular se podría conseguir mediante la utilización de la propia actividad física controlada. Por último, si el objetivo es la reducción de lesiones musculares en los músculos más implicados, el entrenamiento excéntrico parece ser el que mejores beneficios reporta. Por el contrario, parece ser que simplemente con la utilización de protocolos estandarizados como FIFA 11+, parecen no tener efectos beneficiosos sobre éstas.

En relación a los parámetros que engloban a la periodización y programación del entrenamiento, los estudios indican que una duración de 4 semanas mediante la utilización de protocolos durante 3 días a la semana con una duración de 15 minutos aproximadamente es suficiente en la reducción del índice de lesionabilidad. Por último, en relación a la intensidad utilizada, es necesario el estudio de este parámetro en investigaciones futuras para poder establecer protocolos seguros que se dirijan hacia estos objetivos.

**FINANCIACIÓN**

Los autores declaran no tener conflicto de interés y la no financiación por ninguna entidad privada ni pública hacia el proyecto.

**REFERENCIAS BIBLIOGRÁFICAS**

1. Cos F, Cos MT, Buenaventura L, Pruna R, Ekstrand J. Modelos de análisis para la prevención de lesiones en el deporte. Estudio epidemiológico de lesiones: el modelo Union of European Football Associations en el fútbol. Apunt Med l’Esport. 2010;45(166):95–102.

2. Faude O, Junge A, Kindermann W, Dvorak J. Risk factors for injuries in elite female soccer players. Br J Sports Med. 2006;40(9):785–90.

3. Steffen K, Myklebust G, Olsen OE, Holme I, Bahr R. Preventing injuries in female youth football - A cluster-randomized controlled trial. Scand J Med Sci Sport. 2008;18(5):605–14.

4. Del Coso J, Herrero H, Salinero JJ. Injuries in Spanish female soccer players. J Sport Heal Sci [Internet]. 2018;7(2):183–90. doi:10.1016/j.jshs.2016.09.002

5. Junge A, Dvorak J. Injuries in female football players in top-level international tournaments. Br J Sports Med. 2007;41.

6. Söderman K, Werner S, Pietilä T, Engström B, Alfredson H. Balance board training: Prevention of traumatic injuries of the lower extremities in female soccer players? A prospective randomized intervention study. Knee Surgery, Sport Traumatol Arthrosc. 2000;8(6):356–63.

7. Mandelbaum BR, Silvers HJ, Watanabe DS, Knarr JF, Thomas SD, Griffin LY, et al. Effectiveness of a neuromuscular and proprioceptive training program in preventing anterior cruciate ligament injuries in female athletes: 2-Year follow-up. Am J Sports Med. 2005;33(7):1003–10.

8. Lauersen JB, Bertelsen DM, Andersen LB. The effectiveness of exercise interventions to prevent sports injuries: A systematic review and meta-analysis of randomised controlled trials. Br J Sports Med. 2014;48(11):871–7.

9. Alentorn-Geli E, Myer GD, Silvers HJ, Samitier G, Romero D, Lázaro-Haro C, et al. Prevention of non-contact anterior cruciate ligament injuries in soccer players. Part 2: A review of prevention programs aimed to modify risk factors and to reduce injury rates. Knee Surgery, Sport Traumatol Arthrosc. 2009;17(8):859–79.

10. Schiftan GS, Ross LA, Hahne AJ. The effectiveness of proprioceptive training in preventing ankle sprains in sporting populations: A systematic review and meta-analysis. J Sci Med Sport [Internet]. 2015;18(3):238–44. doi:10.1016/j.jsams.2014.04.005

11. Willson JD, Dougherty CP, Ireland ML, Davis IMC. Core stability and its relationship to lower extremity function and injury. J Am Acad Orthop Surg. 2005;13(5):316–25.

12. Owen A, Wong DP, Dellal A, Paul DJ, Orhant E, Collie S. Effect of an injury prevention program on muscle injuries in elite Professional Soccer. 2013;27(12):3275–85.

13. Goode AP, Reiman MP, Harris L, DeLisa L, Kauffman A, Beltramo D, et al. Eccentric training for prevention of hamstring injuries may depend on intervention compliance: A systematic review and meta-analysis. Br J Sports Med. 2015;49(6):349–56.

14. Greska E, Cortes N, Van Lunnen B, Oñate J. A FEEDBACK INCLUSIVE NEUROMUSCULAR TRAINING PROGRAM ALTERS FRONTAL PLANE KINEMATICS. J Strenght Cond Res. 2012;26(6):1609–19.

15. Gilchrist J, Mandelbaum BR, Melancon H, Ryan GW, Silvers HJ, Griffin LY, et al. A randomized controlled trial to prevent noncontact anterior cruciate ligament injury in female collegiate soccer players. Am J Sports Med. 2008;36(8):1476–83.

16. Emery CA, Meeuwisse WH. The effectiveness of a neuromuscular prevention strategy to reduce injuries in youth soccer: A cluster-randomised controlled trial. Br J Sports Med. 2010;44(8):555–62.

17. Eisen T, Danoff J, Leone J, Miller T. The effects of multiaxial and uniaxial unstable surface baance training in college atheletes. J Strenght Cond Res. 2010;1740–5.

18. Zebis MK, Andersen LL, Brandt M, Myklebust G, Bencke J, Lauridsen HB, et al. Effects of evidence-based prevention training on neuromuscular and biomechanical risk factors for ACL injury in adolescent female athletes: A randomised controlled trial. Br J Sports Med. 2016;50(9):552–7.

19. Myer GD, Ford KR, Hewett TE. Methodological approaches and rationale for training to prevent anterior cruciate ligament injuries in female athletes. Scand J Med Sci Sport. 2004;14(5):275–85.

20. Giza E, Mithöfer K, Farrell L, Zarins B, Gill T. Injuries in women’s professional soccer. Br J Sports Med. 2005;39(4):212–6.

21. Steffen K, Bakka HM, Myklebust G, Bahr R. Performance aspects of an injury prevention program: A ten-week intervention in adolescent female football players. Scand J Med Sci Sport. 2008;18(5):596–604.

22. Grooms DR, Onate JA. Neuroscience Application to Noncontact Anterior Cruciate Ligament Injury Prevention. Sports Health. 2016;8(2):149–52.

23. Munro A, Herrington L, Comfort P. Comparison of landing knee valgus angle between female basketball and football athletes: Possible implications for anterior cruciate ligament and patellofemoral joint injury rates. Phys Ther Sport [Internet]. 2012;13(4):259–64. doi:10.1016/j.ptsp.2012.01.005

24. Stojanovic MD, Ostojic SM. Preventing ACL injuries in team-sport athletes: A systematic review of training interventions. Res Sport Med. 2012;20(3–4):223–38.

25. Rodríguez C, Echegoyen S, Aoyama T. The effects of “prevent injury and enhance performance program” in a female soccer team. J Sports Med Phys Fitness. 2018;58(5):659–63.

26. De Hoyo M, Pozzo M, Sañudo B, Carrasco L, Gonzalo-Skok O, Domínguez-Cobo S, et al. Effects of a 10-week in-season eccentric-overload training program on muscle-injury prevention and performance in junior elite soccer players. Int J Sports Physiol Perform. 2015;10(1):46–52.

27. Fanchini M, Steendahl IB, Impellizzeri FM, Pruna R, Dupont G, Coutts AJ, et al. Exercise-Based Strategies to Prevent Muscle Injury in Elite Footballers: A Systematic Review and Best Evidence Synthesis. Sport Med [Internet]. 2020. doi:10.1007/s40279-020-01282-z
